# Supplementary material for: Detection of Human Papillomavirus in Squamous Lesions of the Conjunctiva Using RNA and DNA In-Situ Hybridization
Source: MDPI journal article supplement (doi:10.3390/ijms23137249), 2022-06-29
Supplement: s1 [file s1]

**Table S1.** Clinicopathologic characteristics of individual cases of squamous conjunctival proliferations.

| Lesion Type | Case # | Age (y) | Sex | Clinical Location of Lesion | LR-HPV Status | HR-HPV Status | Atopic Status                   |
|-------------|--------|---------|-----|-----------------------------|---------------|---------------|---------------------------------|
| Papilloma   | 1      | 46      | F   | --                          | +             | -             | --                              |
|             | 2      | 38      | M   | --                          | +             | -             | --                              |
|             | 3      | 44      | F   | forniceal                   | +             | -             | asthma, rhinitis/conjunctivitis |
|             | 4      | 35      | F   | palpebral                   | +             | -             | rhinitis/conjunctivitis         |
|             | 5      | 46      | M   | palpebral                   | +             | -             | asthma                          |
|             | 6      | 36      | F   | palpebral                   | +             | -             | asthma, eczema                  |
|             | 7      | 35      | M   | bulbar                      | +             | -             | --                              |
|             | 8      | 43      | M   | palpebral                   | +             | -             | none                            |
|             | 9      | 54      | F   | palpebral                   | +             | -             | --                              |
|             | 10     | 47      | F   | palpebral                   | +             | NP            | none                            |
|             | 11     | 9       | F   | palpebral                   | -             | -             | rhinitis/conjunctivitis         |
|             | 12     | 11      | F   | forniceal                   | -             | -             | asthma                          |
|             | 13     | 38      | M   | palpebral                   | +             | -             | none                            |
|             | 14     | 56      | M   | palpebral*                  | +             | -             | asthma                          |
|             | 15     | 32      | F   | palpebral                   | +             | -             | asthma                          |
|             | 16     | 31      | M   | palpebral                   | NP            | +             | none                            |
|             | 17     | 57      | M   | palpebral                   | +             | -             | --                              |
|             | 18     | 43      | M   | --                          | NP            | -             | --                              |
|             | 19     | 86      | M   | bulbar                      | -             | -             | --                              |
|             | 20     | 33      | M   | palpebral                   | +             | -             | eczema                          |
|             | 21     | 48      | M   | --                          | +             | -             | --                              |
|             | 22     | 70      | F   | bulbar                      | -             | -             | --                              |
|             | 23     | 24      | F   | bulbar                      | +             | -             | asthma                          |
|             | 24     | 13      | M   | palpebral                   | +             | NP            | asthma                          |
|             | 25     | 24      | F   | palpebral                   | +             | -             | --                              |
|             | 26     | 64      | F   | --                          | +             | -             | --                              |
|             | 27     | 37      | M   | palpebral                   | +             | -             | --                              |
|             | 28     | 55      | F   | palpebral                   | -             | NP            | asthma, rhinitis/conjunctivitis |
|             | 29     | 60      | F   | palpebral                   | NP            | +             | --                              |
|             | 30     | 49      | M   | palpebral                   | +             | -             | asthma                          |
|             | 31     | 37      | M   | palpebral                   | +             | -             | --                              |
|             | 32     | 35      | M   | palpebral                   | +             | NP            | asthma                          |
|             | 33     | 67      | M   | forniceal                   | +             | -             | --                              |
| CIN         | 34     | 80      | M   | bulbar                      | -             | -             | --                              |
|             | 35     | 72      | F   | bulbar                      | -             | -             | --                              |
|             | 36     | 74      | M   | --                          | NP            | -             | --                              |
|             | 37     | 63      | M   | bulbar                      | -             | -             | --                              |
|             | 38     | 53      | M   | palpebral                   | -             | -             | --                              |
|             | 39     | 49      | M   | bulbar                      | -             | +             | none                            |
|             | 40     | 72      | M   | bulbar                      | NP            | -             | asthma                          |
|             | 41     | 83      | F   | palpebral                   | -             | -             | none                            |
|             | 42     | 73      | M   | --                          | -             | -             | --                              |
| cCIS        | 43     | 89      | M   | bulbar                      | NP            | -             | none                            |
|             | 44     | 69      | M   | --                          | -             | -             | --                              |
|             | 45     | 71      | M   | --                          | -             | -             | --                              |
|             | 46     | 61      | F   | --                          | NP            | -             | --                              |
|             | 47     | 56      | F   | bulbar                      | -             | -             | --                              |
|             | 48     | 69      | F   | bulbar                      | -             | -             | --                              |
|             | 49     | 61      | M   | bulbar                      | NP            | -             | none                            |

| SCC |    |   |           |    |   |    |  |
|-----|----|---|-----------|----|---|----|--|
| 50  | 72 | F | --        | -  | + | -- |  |
| 51  | 61 | F | --        | NP | - | -- |  |
| 52  | 90 | M | palpebral | NP | + | -- |  |
| 53  | 73 | F | --        | NP | - | -- |  |

--: case submitted as outside consult; EMR unavailable , CIN: conjunctiva intraepithelial neoplasia, cCIS: conjunctival carcinoma *in situ*, SCC: invasive squamous cell carcinoma, NP: not performed; \*: recurrent lesion
